# Supplementary material
Source: PubMed Central journal article supplement (PMC10272109)
Supplement: NIHMS1883406-supplement-Supplementary_figures.pdf [file NIHMS1883406-supplement-Supplementary_figures.pdf]

**A** Oxytocin treatment baseline

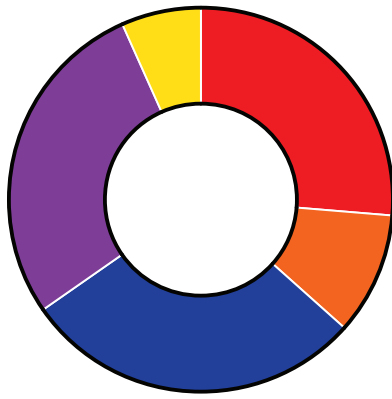

n = 416 ROIs

**B** Saline treatment baseline

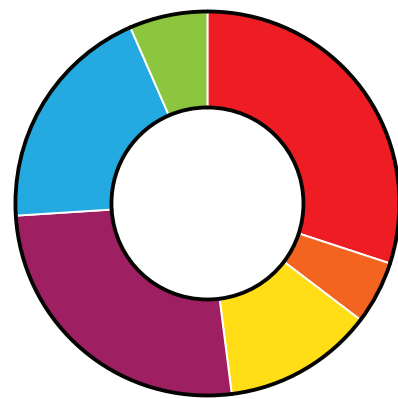

n = 396 ROIs

**Figure S1: Summary statistics on the recorded ROIs for each animal. Related to Figure 1. (A)** Total number of recorded regions of interest (ROIs) during the baseline session prior to oxytocin treatment in 5 rats (n = 416 ROIs). Each color represents ROIs recorded from a single rat. **(B)** Total number of ROIs recorded during the baseline session prior to saline treatment in 6 rats (n = 396 ROIs). Each color represents ROIs recorded from a single rat.

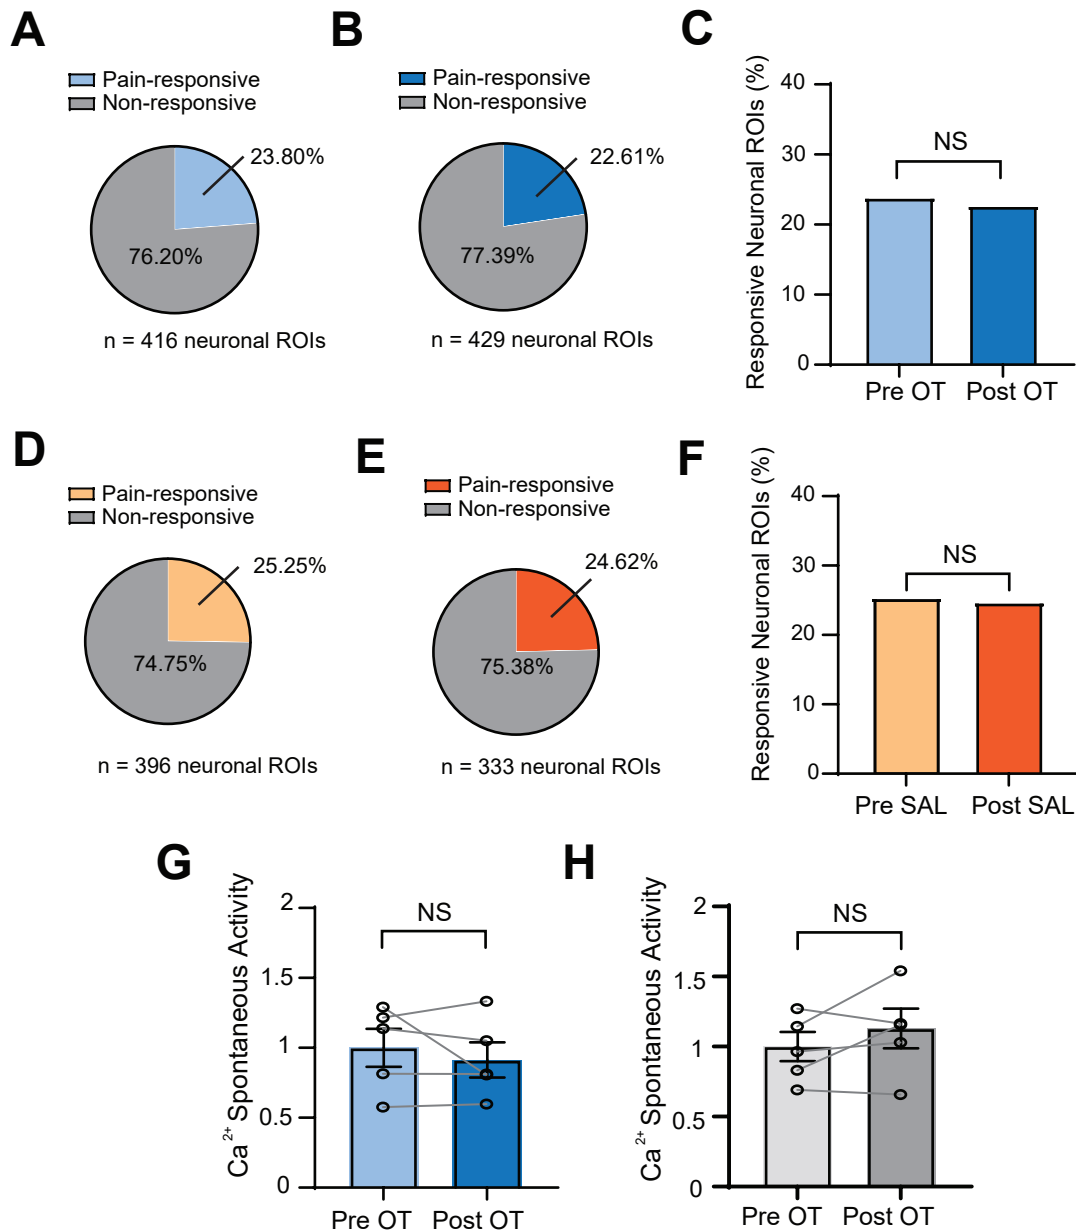

**Figure S2: Neuronal activity in the PL-PFC before and after intracranial injections. Related to Figure 1. (A)** A total of 23.90% neuronal ROIs in the PL-PFC were pain-responsive pre-oxytocin (OT) (n = 416 neuronal ROIs). **(B)** 22.61% neuronal ROIs in the PL-PFC were pain-responsive post-OT (n = 429 neuronal ROIs). **(C)** The percentage of pain-responsive neuronal ROIs exhibited no change after OT administration (p = 0.6846, Fisher's exact test). **(D)** 25.25% neuronal ROIs in the PL-PFC were pain-responsive pre-saline (n = 396 neuronal ROIs). **(E)** 24.62% neuronal ROIs in the PL-PFC were pain-responsive post-saline (n = 333 neuronal ROIs). **(F)** The percentage of pain-responsive neuronal ROIs exhibited no change after saline (SAL) administration (p = 0.8639, Fisher's exact test). **(G)** There was no change in spontaneous activity (normalized to pre OT) in pain-responsive neuronal ROIs before and after OT administration (p = 0.4517, paired t-test; n = 5 animals). **(H)** There was no change in spontaneous activity (normalized to pre OT) in all neuronal ROIs before and after OT administration (p = 0.2626, paired t-test; n = 5 animals). For all comparisons, n = 5 OT and n = 6 SAL animals. Error bars are S.E.M.

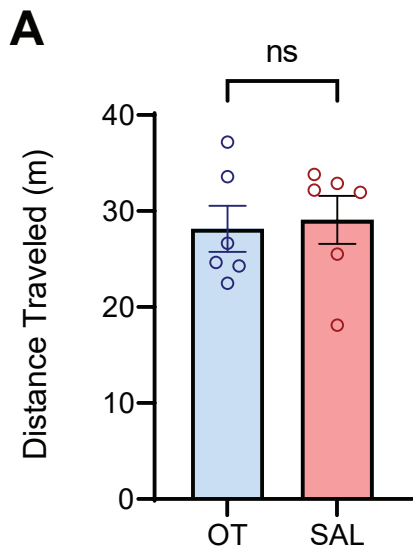

**Figure S3: Locomotion following oxytocin (OT) or saline (SAL) injection into the PL-PFC. Related to Figure 2. (A)** Intracranial delivery of oxytocin did not alter the total distance traveled relative to that of saline treatment (unpaired t test,  $p = 0.7935$ ;  $n = 6$  OT and  $n = 6$  SAL).

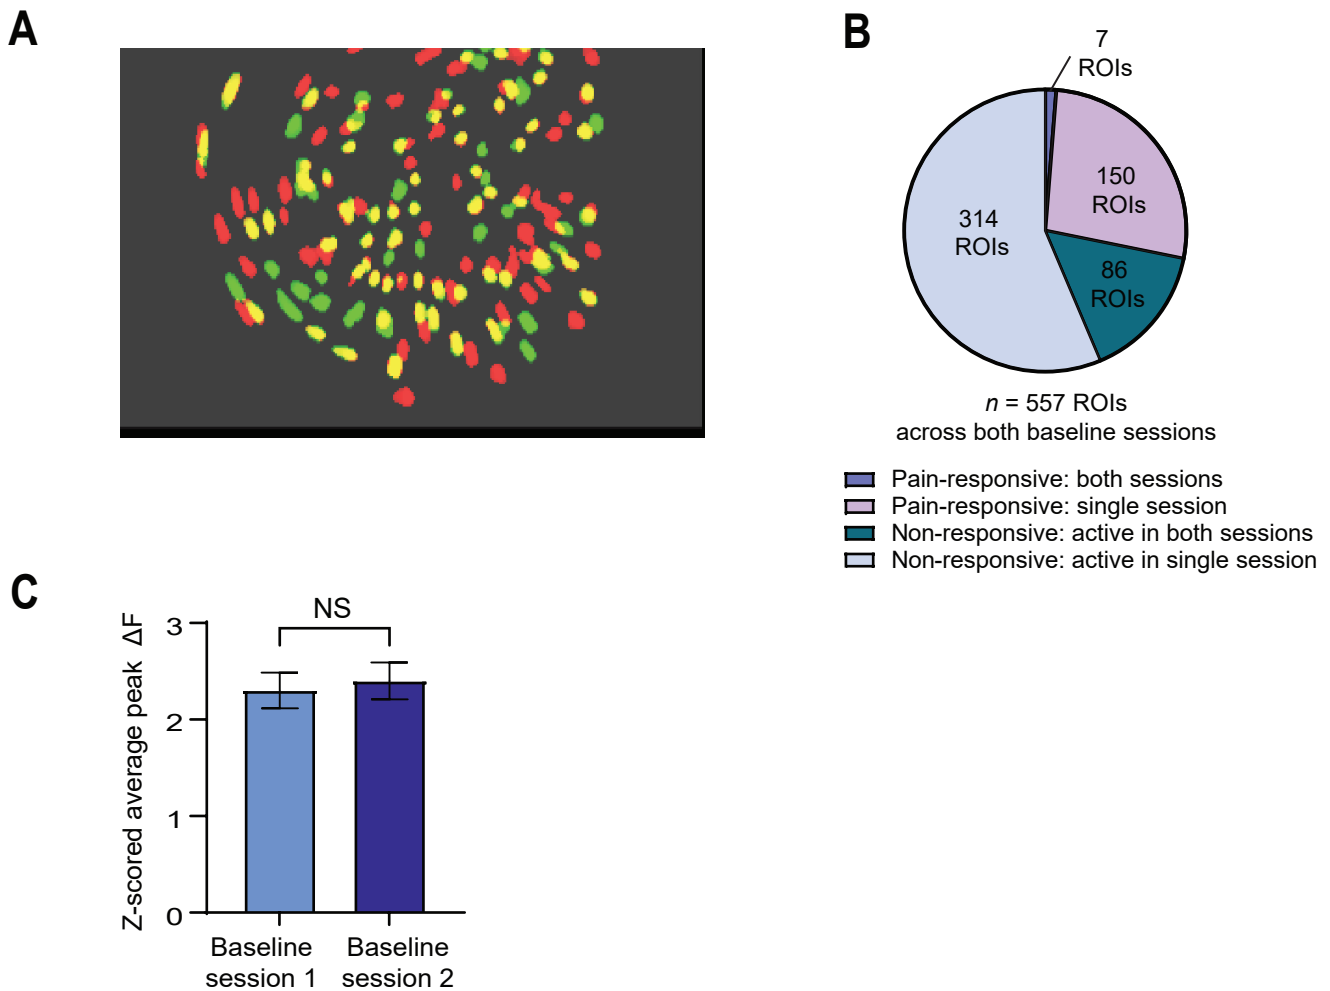

**Figure S4: Baseline neuronal activity in the PL-PFC across sessions. Related to Figure 6. (A)** Contours of all active neuronal regions of interest (ROIs) matched across two baseline recording sessions on separate days from a single rat. ROIs were considered active when they exhibited changes in fluorescence during the recording session. Red indicates neuronal activity from the first session; green indicates activity from the second session; yellow indicates overlap of activity from both sessions. **(B)** Distribution of pain-responsive and non-responsive neuronal ROIs across sessions in 3 rats. Very few ROIs were considered pain-responsive in both baseline sessions. **(C)** No significant difference in mean peak  $\Delta F$  was observed in the PL-PFC across baseline sessions in 3 rats ( $p = 0.7114$ , unpaired t test;  $n = 351$  baseline session 1 and  $n = 338$  baseline session 2 neuronal ROIs). Error bars are S.E.M.

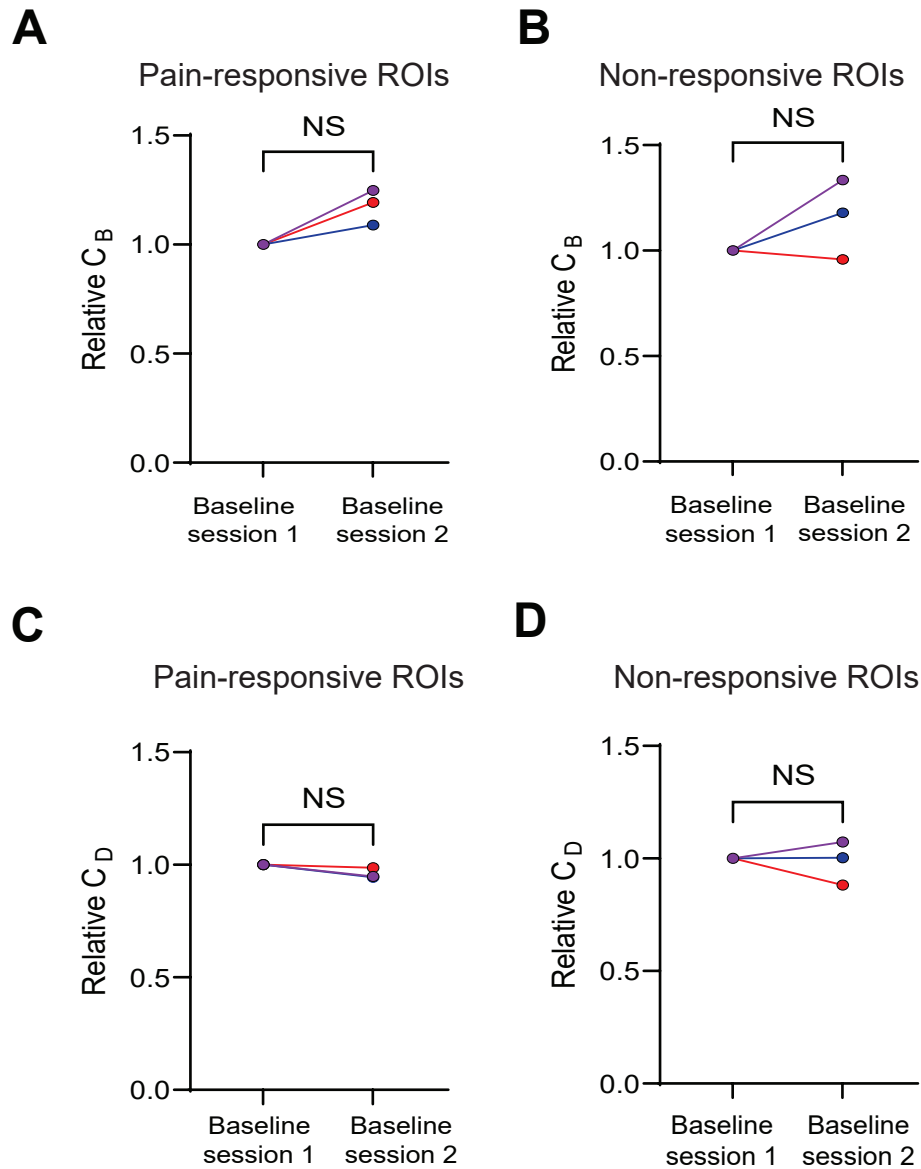

**Figure S5: Betweenness and degree centralities are stable across baseline sessions in pain-responsive ROIs. Related to Figure 6.** Relative centralities are normalized to baseline session 1. **(A)** Relative betweenness centrality ( $C_B$ ) of pain-responsive ROIs did not have a significant change between baseline sessions recorded from two separate days ( $p = 0.0633$ , paired t test). **(B)** Relative  $C_B$  of non-responsive ROIs did not have a significant change in baseline recordings across days ( $p = 0.2866$ , paired t test). **(C)** Relative degree centrality ( $C_D$ ) of pain-responsive ROIs did not change significantly across days in the baseline condition ( $p = 0.0992$ , paired t test). **(D)** Relative  $C_D$  of non-responsive ROIs experienced no significant change across recording sessions in the baseline condition ( $p = 0.8237$ , paired t test).  $n = 3$  animals for all comparisons.

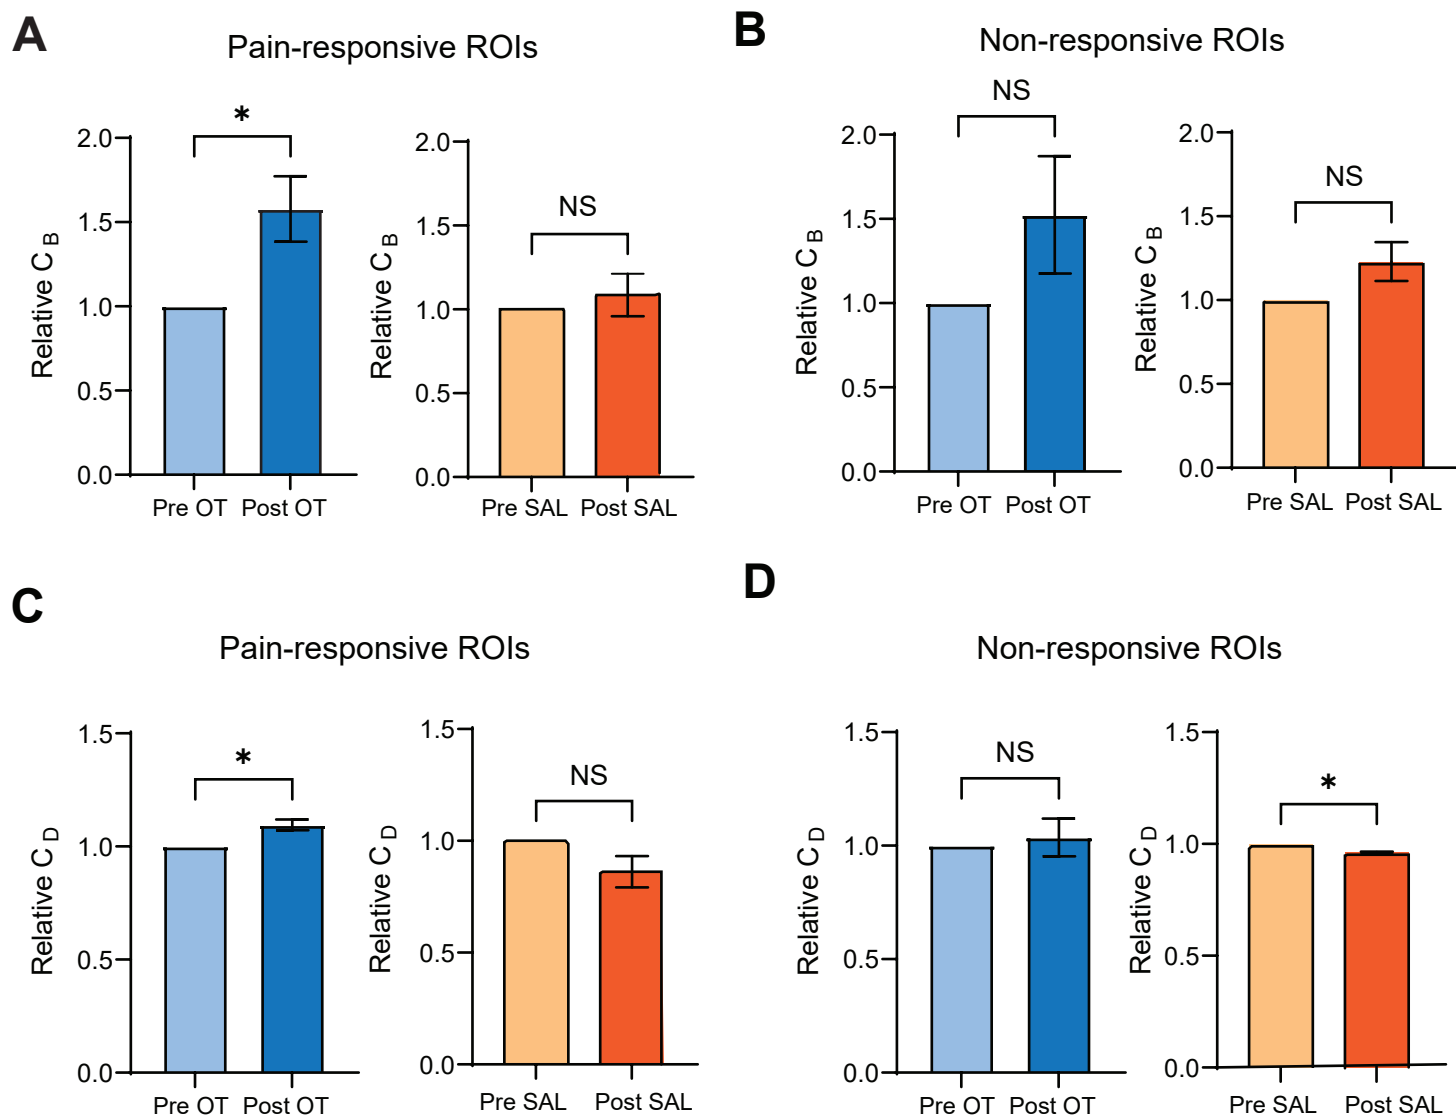

**Figure S6: Oxytocin enhances betweenness and degree centralities of pain-responsive ROIs. Related to Figure 6.** Relative centralities are normalized to the baseline (pre oxytocin or pre saline condition). **(A)** An increase in relative betweenness centrality ( $C_B$ ) of pain-responsive ROIs is observed post OT treatment, but not post SAL treatment (paired t test; pre OT versus post OT:  $p < 0.05$ ; pre SAL versus post SAL:  $p = 0.6202$ ). **(B)** No significant change in  $C_B$  of non-responsive ROIs was observed after either OT or SAL treatment (paired t test; pre OT versus post OT:  $p = 0.2068$ ; pre SAL versus post SAL:  $p = 0.2980$ ). **(C)** An increase in relative degree centrality ( $C_D$ ) of pain-responsive ROIs is observed post OT treatment, but not post SAL treatment (paired t test; pre OT versus post OT:  $p < 0.05$ ; pre SAL versus post SAL:  $p = 0.2997$ ). **(D)** While the  $C_D$  of non-responsive ROIs demonstrated no change post OT treatment, the  $C_D$  exhibited a slight decrease post SAL treatment (paired t test; pre OT versus post OT:  $p = 0.6837$ ; pre SAL versus post SAL:  $p < 0.05$ ).  $n = 5$  OT and  $n = 2$  SAL animals for all comparisons. Error bars are S.E.M.

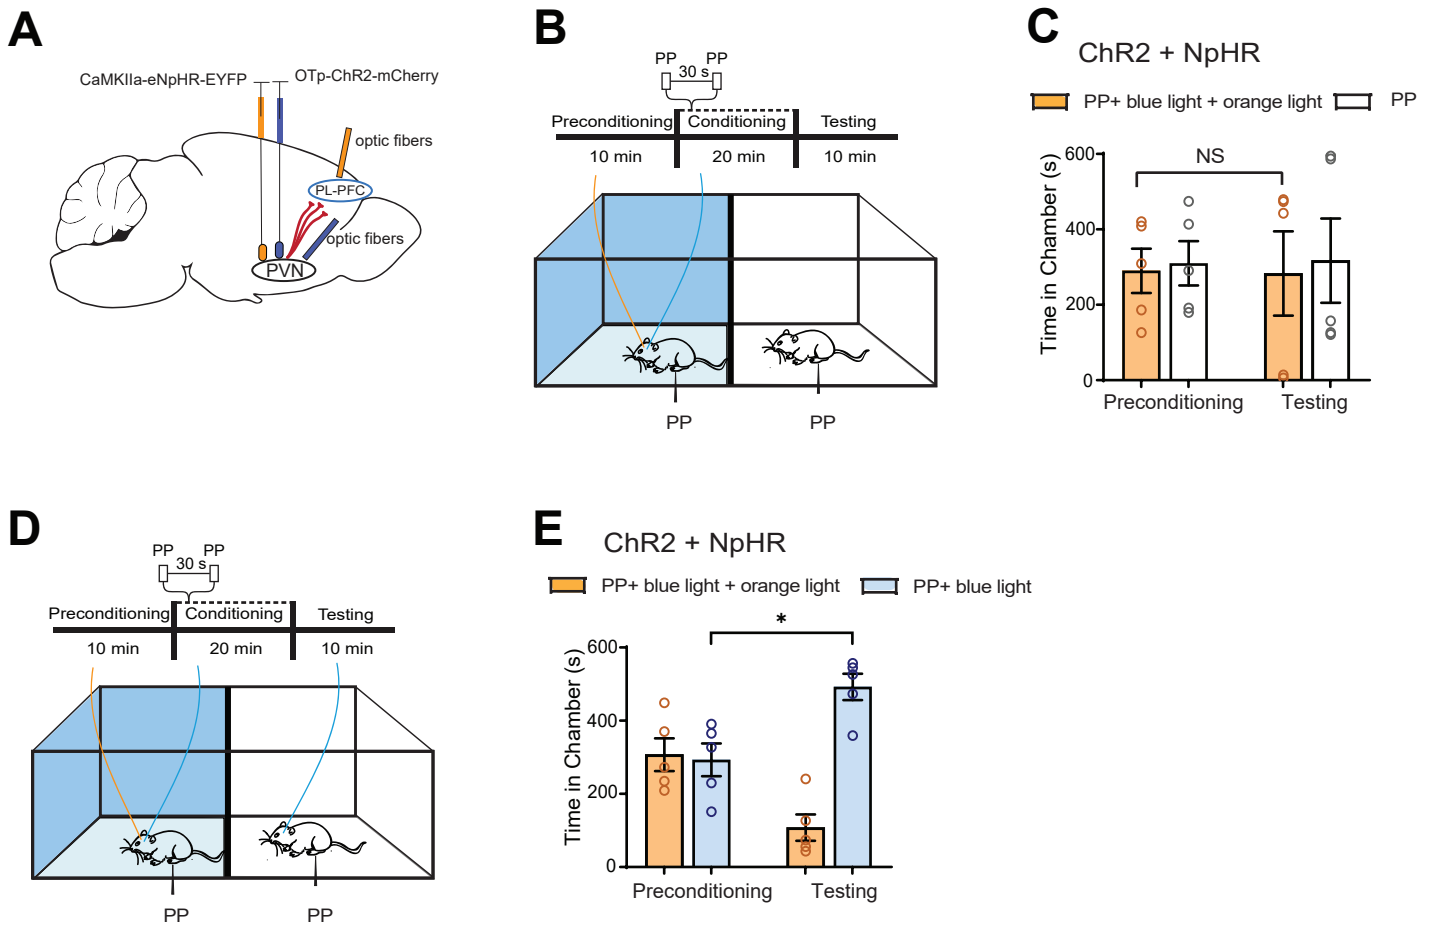

**Figure S7: Optogenetic inhibition of axon terminals of PVN neurons in the PL-PFC suppresses the effect of PVN activation. Related to Figure 7. (A)** Schematic of the injection of OTp-ChR2-mCherry and CamKIIa-eNpHR-EYFP into the PVN, with optic fibers implanted in the PVN and PL-PFC. **(B)** Schematic of CPP assay. One chamber was paired with simultaneous blue light stimulation of the PVN and orange light stimulation of the PL-PFC, whereas the other chamber was paired with no light treatment. **(C)** ChR2 + NpHR rats demonstrated no preference for the chamber associated with simultaneous blue light and orange light treatment ( $p = 0.9982$ , two-way ANOVA with repeated measures and Sidak's multiple comparisons test,  $n = 5$  animals). **(D)** Schematic of CPP assay. One chamber was paired with simultaneous blue light stimulation of the PVN and orange light stimulation of the PL-PFC, while the other chamber was paired with only blue light stimulation of the PVN. **(E)** ChR2 + NpHR rats preferred the chamber associated with only blue light treatment of the PVN ( $p^* < 0.05$ , two-way ANOVA with repeated measures and Sidak's multiple comparisons test,  $n = 5$  animals). Error bars are S.E.M.
